# Supplementary material
Source: MDPI journal article supplement (https://www.mdpi.com/2073-4395/12/4/885)
Supplement: s1 [file s1]

# Antifungal Activity of Methylxanthines against Grapevine Trunk Diseases

E. Sánchez-Hernández, C. Andrés-Juan, L. Buzón-Durán, A. Correa-Guimaraes, J. Martín-Gil, P. Martín-Ramos

## SUPPLEMENTARY MATERIAL

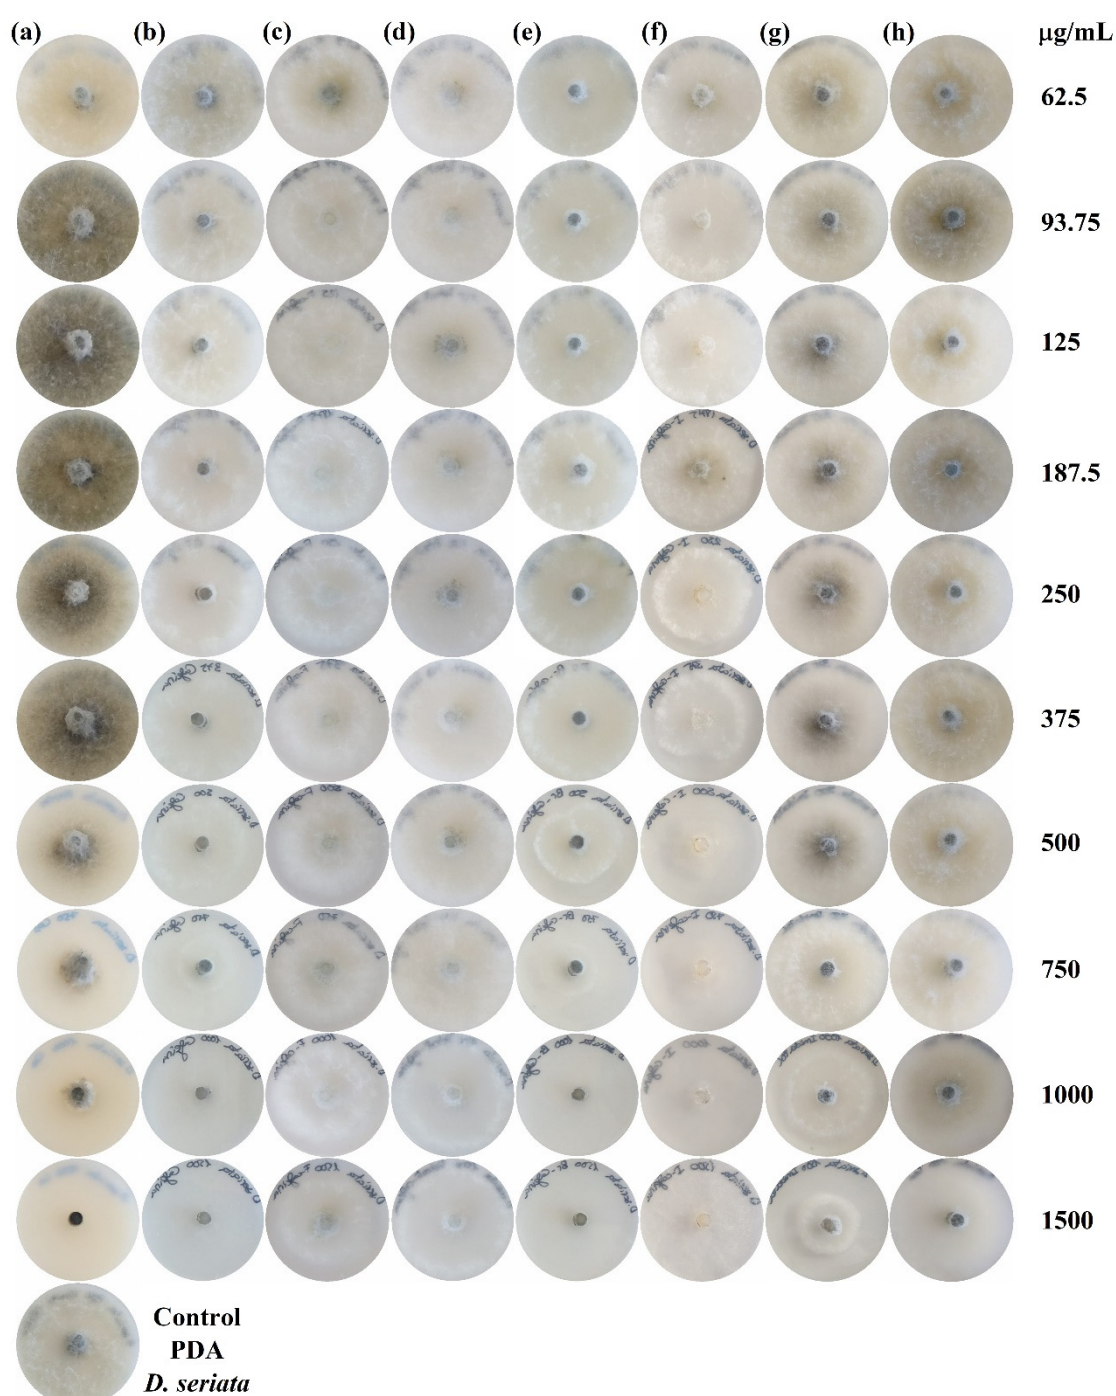

**Figure S1.** Mycelial growth inhibition of *D. seriata* upon treatment with (a) COS, (b) caffeine, (c) F-phenoxycaffeine, (d) 4F-phenoxycaffeine, (e) Br-caffeine, (f) I-caffeine, (g) imidazole, and (h) theophylline at different concentrations. Only one replicate per treatment and concentration is shown. The control is shown in the bottom left corner.

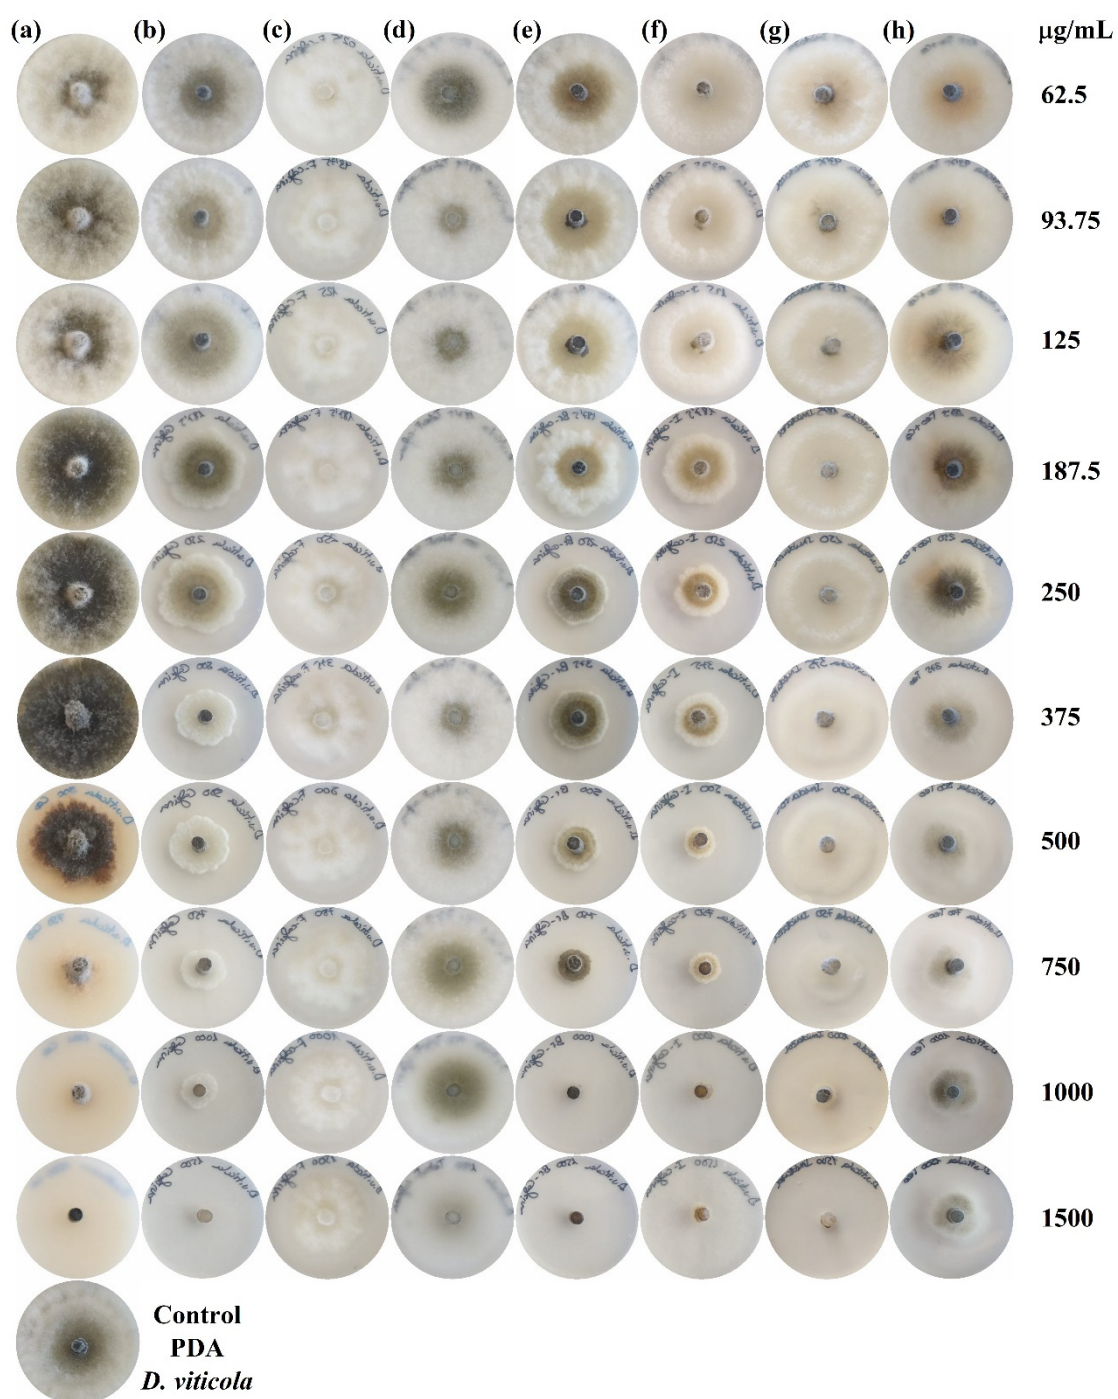

**Figure S2.** Mycelial growth inhibition of *D. viticola* upon treatment with (a) COS, (b) caffeine, (c) F-phenoxycaffeine, (d) 4F-phenoxycaffeine, (e) Br-caffeine, (f) I-caffeine, (g) imidazole, and (h) theophylline at different concentrations. Only one replicate per treatment and concentration is shown. The control is shown in the bottom left corner.



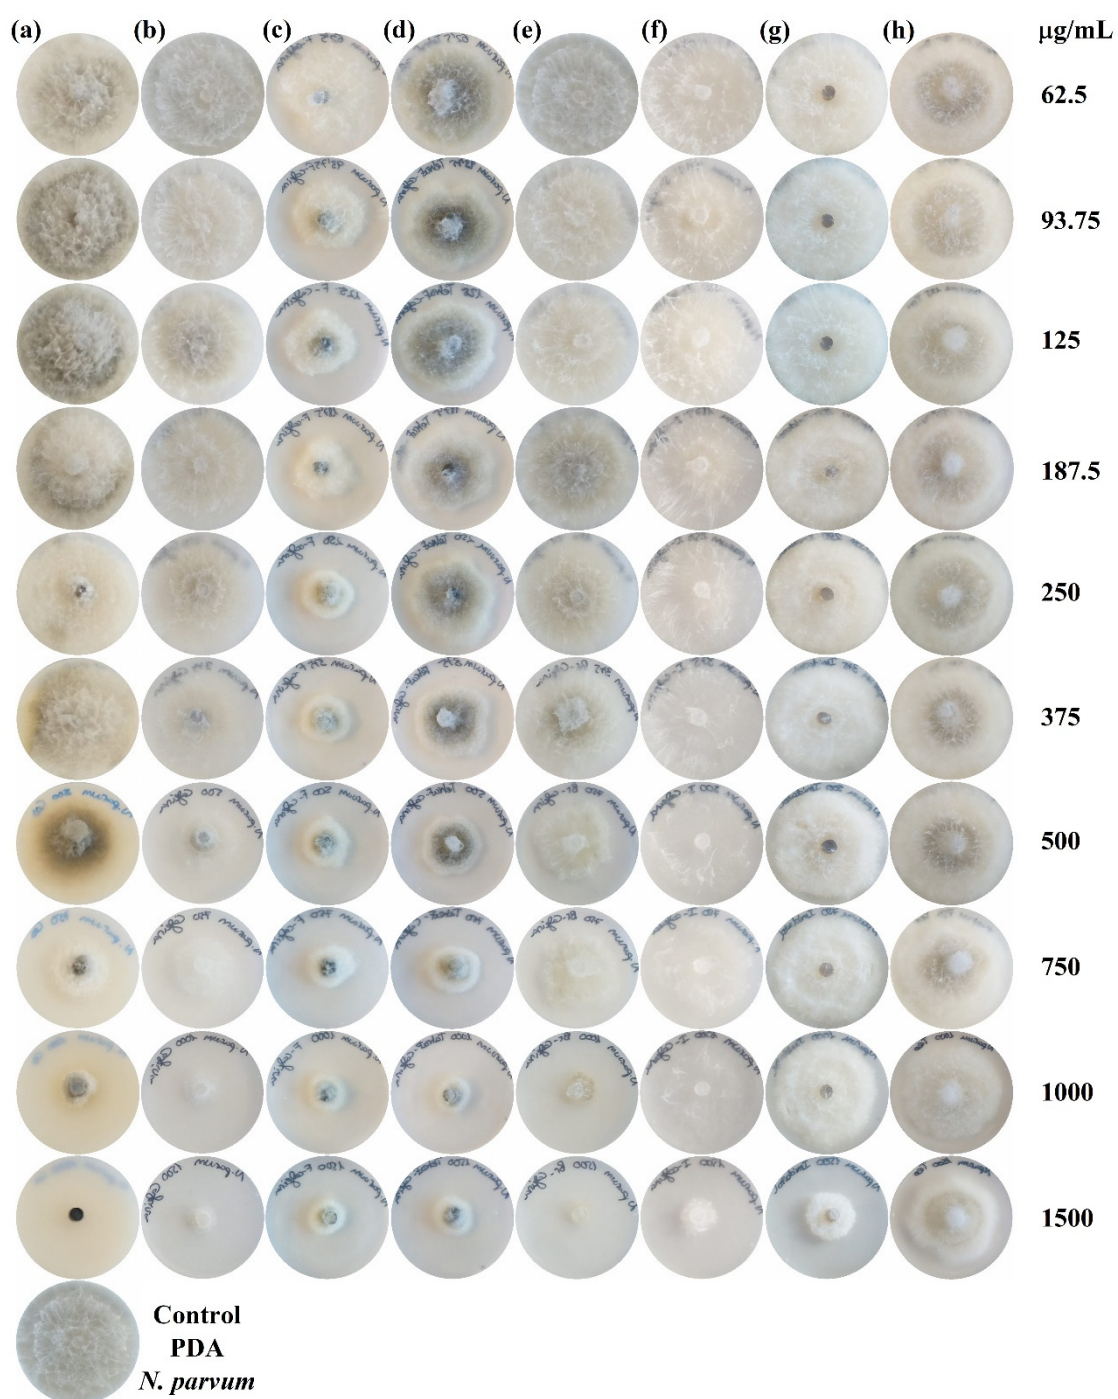

**Figure S3.** Mycelial growth inhibition of *N. parvum* upon treatment with (a) COS, (b) caffeine, (c) F-phenoxycaffeine, (d) 4F-phenoxycaffeine, (e) Br-caffeine, (f) I-caffeine, (g) imidazole, and (h) theophylline at different concentrations. Only one replicate per treatment and concentration is shown. The control is shown in the bottom left corner.

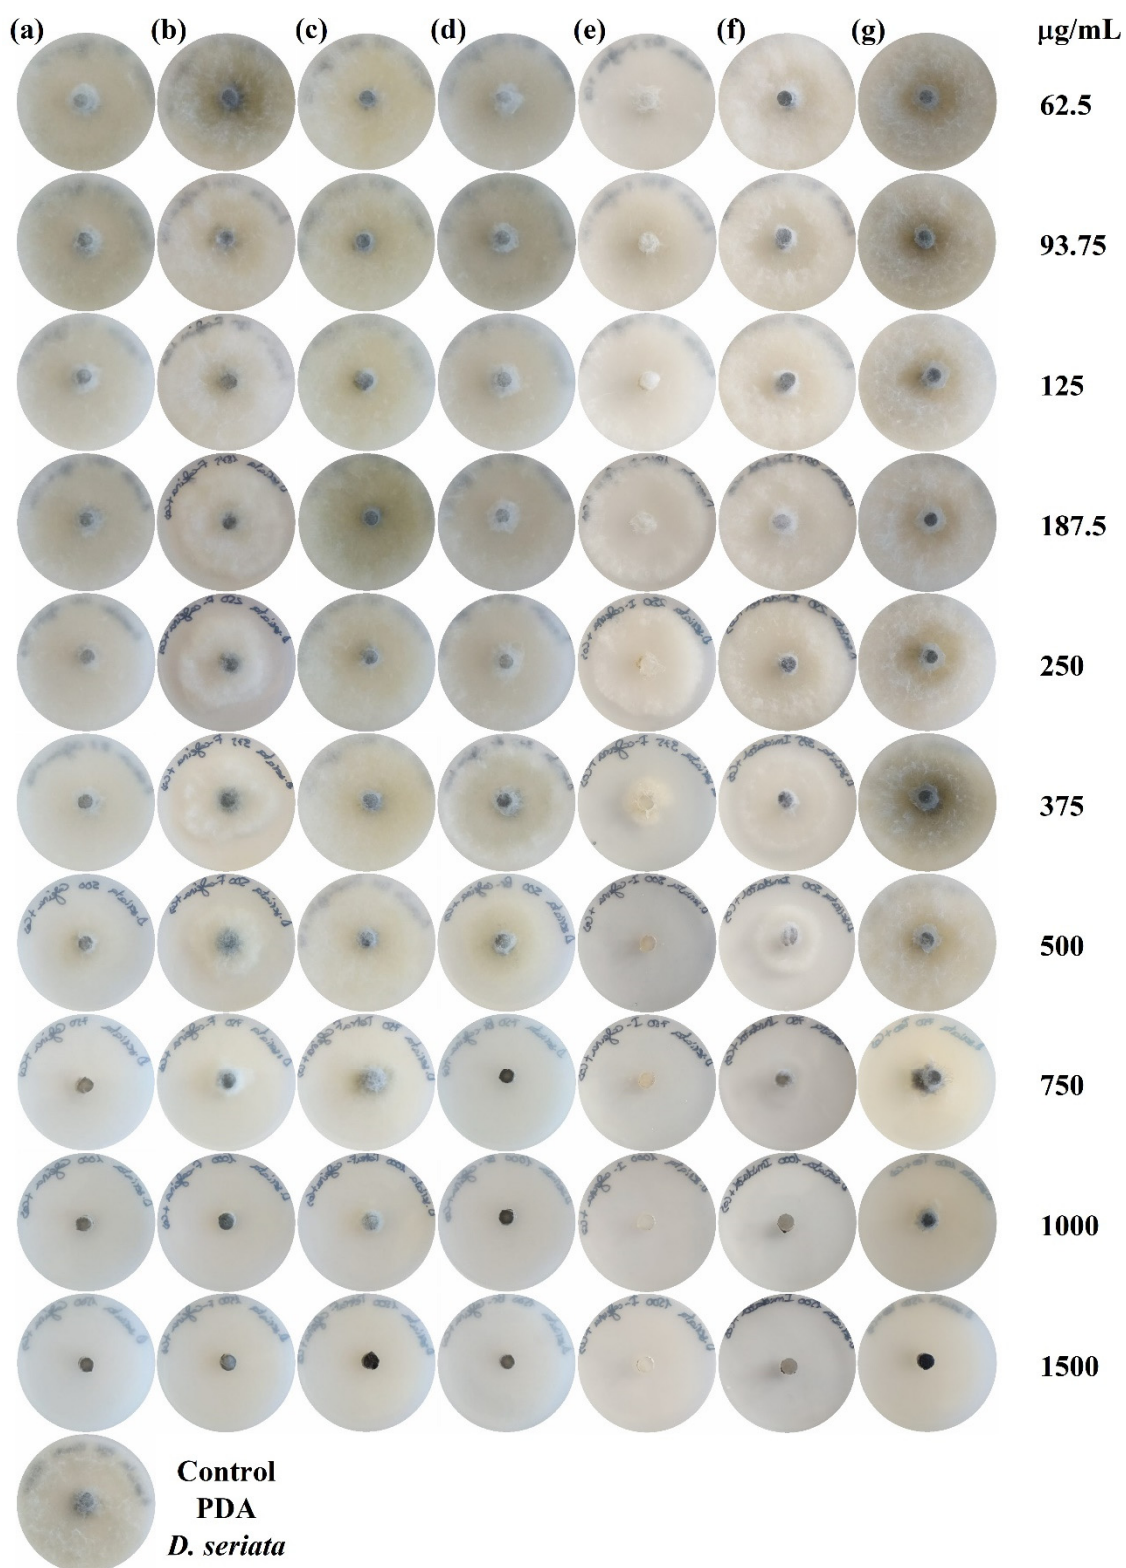

**Figure S4.** Mycelial growth inhibition of *D. seriata* upon treatment with COS conjugated complexes: (a) COS-caffeine, (b) COS-F-phenoxycaffeine, (c) COS-4F-phenoxycaffeine, (d) COS-Br-caffeine, (e) COS-I-caffeine, (f) COS-imidazole, and (g) COS-theophylline at different concentrations. Only one replicate per treatment and concentration is shown. The control is shown in the bottom left corner.



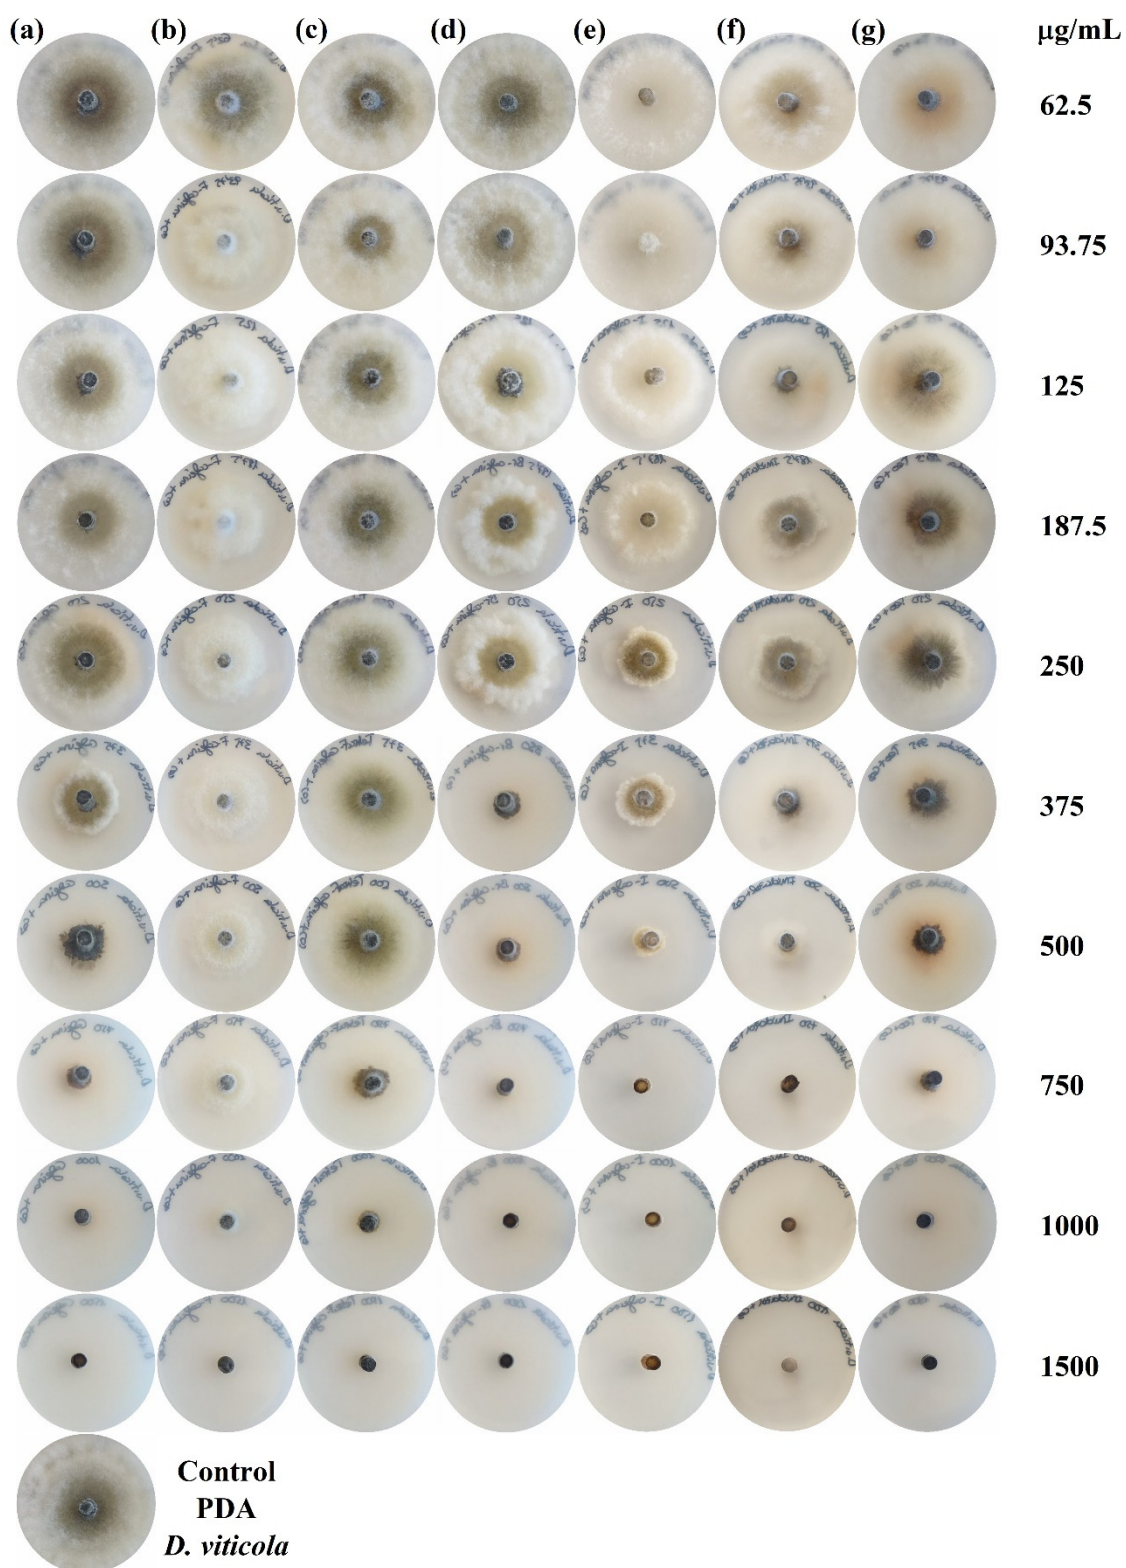

**Figure S5.** Mycelial growth inhibition of *D. viticola* upon treatment with COS conjugated complexes: (a) COS-caffeine, (b) COS-F-phenoxycaffeine, (c) COS-4F-phenoxycaffeine, (d) COS-Br-caffeine, (e) COS-I-caffeine, (f) COS-imidazole, and (g) COS-theophylline at different concentrations. Only one replicate per treatment and concentration is shown. The control is shown in the bottom left corner.

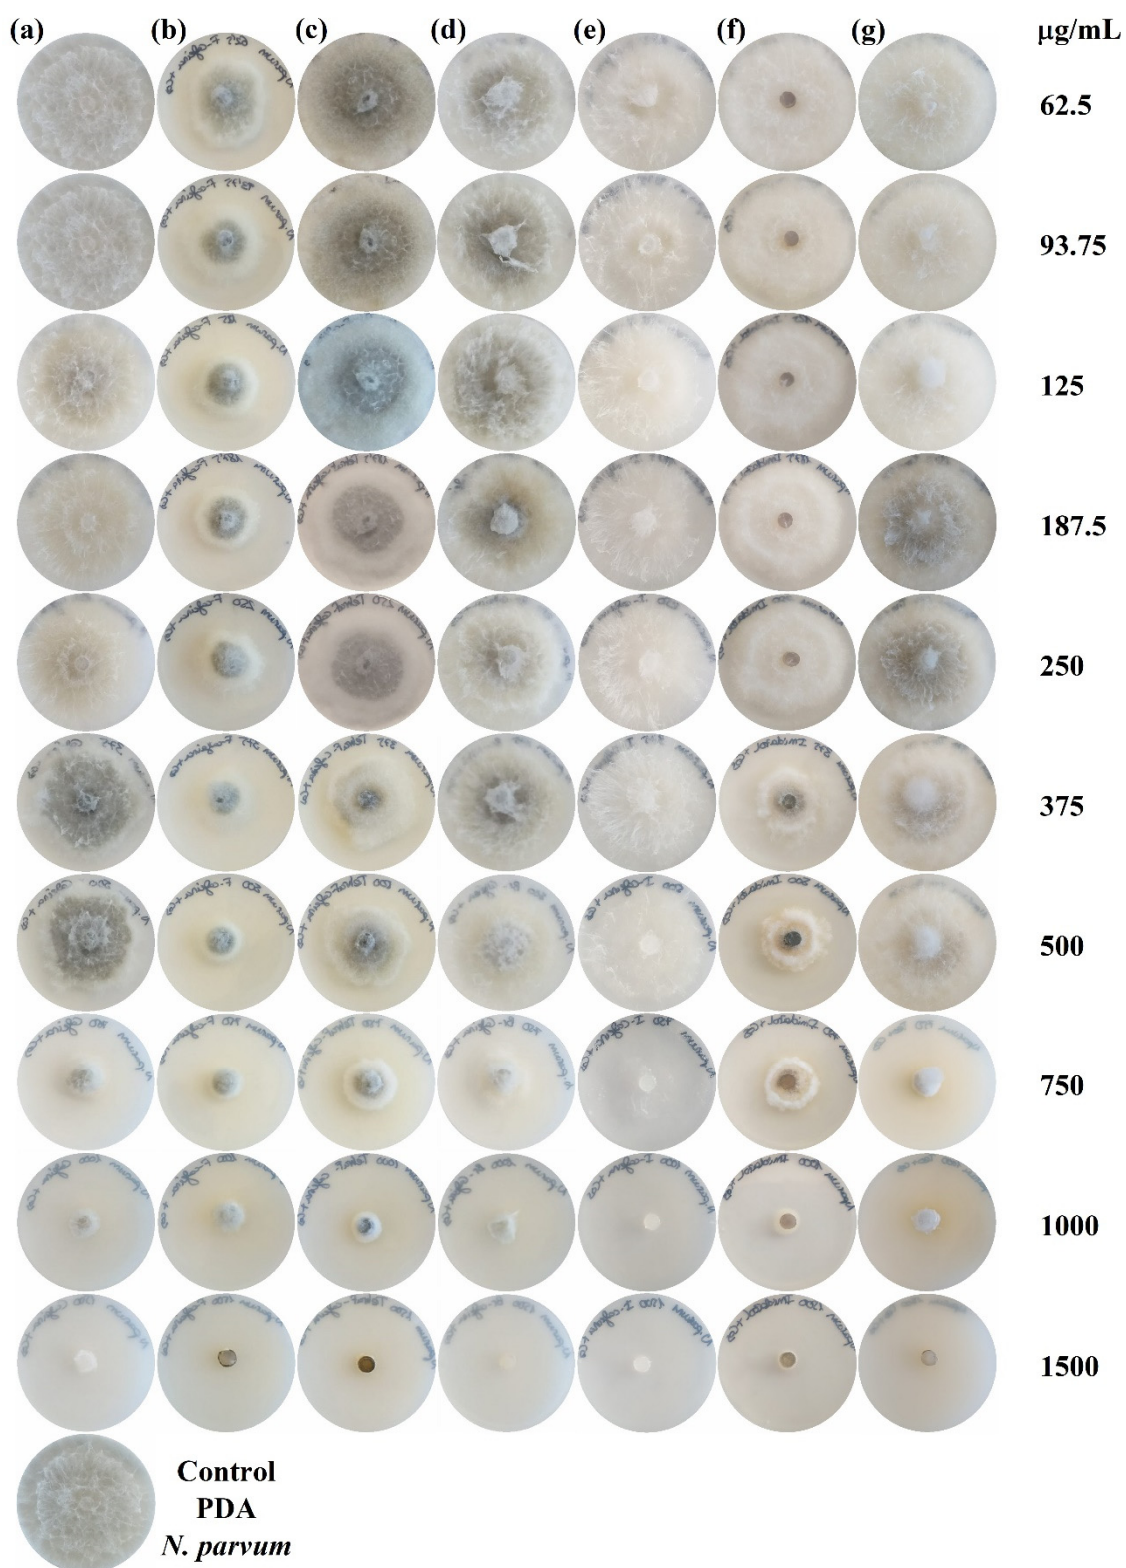

**Figure S6.** Mycelial growth inhibition of *N. parvum* upon treatment with COS conjugated complexes: (a) COS-caffeine, (b) COS-F-phenoxycaffeine, (c) COS-4F-phenoxycaffeine, (d) COS-Br-caffeine, (e) COS-I-caffeine, (f) COS-imidazole, and (g) COS-theophylline at different concentrations. Only one replicate per treatment and concentration is shown. The control is shown in the bottom left corner.

**Table S1.** Summary of multiple pairwise comparisons using Tukey’s HSD test for each treatment-concentration combination against each of the three phytopathogenic fungi. The same letters next to the radial growth of the mycelium (average values expressed in mm) indicate that the treatment-concentration combinations are not significantly different at  $p < 0.05$ . Tukey’s HSD lettered groupings follow the sequence a-z, A-Z,  $\alpha$ - $\epsilon$ , where ‘a’ indicates the group of treatment-concentration combinations with the highest efficacy and ‘ $\epsilon$ ’ the group of least effective treatment-concentration combinations.

| <i>D. seriata</i>                |                           | <i>D. viticola</i>              |                           | <i>N. parvum</i>                 |                           |
|----------------------------------|---------------------------|---------------------------------|---------------------------|----------------------------------|---------------------------|
| Treatment-concentration          | Radial Growth of Mycelium | Treatment-concentration         | Radial Growth of Mycelium | Treatment-concentration          | Radial Growth of Mycelium |
| COS-Theophylline-Imidazole-375   | 75.0 C                    | 4F-Phenoxycaffeine-62.5         | 75.0 W                    | COS-Theophylline-Imidazole-93.75 | 75.0 $\epsilon$           |
| COS-Theophylline-Imidazole-125   | 75.0 C                    | COS-Theophylline-Imidazole-62.5 | 75.0 W                    | COS-Theophylline-Imidazole-62.5  | 75.0 $\epsilon$           |
| COS-Theophylline-Imidazole-187.5 | 75.0 C                    | COS-Theophylline-62.5           | 75.0 W                    | COS-Theophylline-Imidazole-125   | 75.0 $\epsilon$           |
| COS-Theophylline-Imidazole-250   | 75.0 C                    | COS-Theophylline-93.75          | 75.0 W                    | COS-I-Caffeine-62.5              | 75.0 $\epsilon$           |
| COS-I-Caffeine-Imidazole-93.75   | 75.0 C                    | COS-4F-Phenoxycaffeine-62.5     | 75.0 W                    | COS-Theophylline-62.5            | 75.0 $\epsilon$           |
| COS-Theophylline-Imidazole-62.5  | 75.0 C                    | COS-Br-Caffeine-62.5            | 75.0 W                    | COS-Theophylline-93.75           | 75.0 $\epsilon$           |
| COS-Theophylline-Imidazole-93.75 | 75.0 C                    | Theophylline-62.5               | 75.0 W                    | COS-Theophylline-187.5           | 75.0 $\epsilon$           |
| COS-I-Caffeine-Imidazole-62.5    | 75.0 C                    | COS-4F-Phenoxycaffeine-93.75    | 75.0 W                    | COS-I-Caffeine-93.75             | 75.0 $\epsilon$           |
| COS-Theophylline-500             | 75.0 C                    | COS-Caffeine-62.5               | 75.0 W                    | COS-I-Caffeine-125               | 75.0 $\epsilon$           |
| 4F-Phenoxycaffeine-62.5          | 75.0 C                    | COS-Caffeine-93.75              | 75.0 W                    | COS-I-Caffeine-187.5             | 75.0 $\epsilon$           |
| COS-Theophylline-250             | 75.0 C                    | COS-Caffeine-125                | 75.0 W                    | COS-Theophylline-125             | 75.0 $\epsilon$           |
| COS-Theophylline-375             | 75.0 C                    | Theophylline-93.75              | 75.0 W                    | COS-Br-Caffeine-93.75            | 75.0 $\epsilon$           |
| COS-Theophylline-125             | 75.0 C                    | Theophylline-125                | 75.0 W                    | Theophylline-62.5                | 75.0 $\epsilon$           |
| COS-Theophylline-187.5           | 75.0 C                    | Theophylline-187.5              | 75.0 W                    | COS-4F-Phenoxycaffeine-62.5      | 75.0 $\epsilon$           |
| COS-Theophylline-62.5            | 75.0 C                    | I-Caffeine-62.5                 | 75.0 W                    | COS-4F-Phenoxycaffeine-93.75     | 75.0 $\epsilon$           |
| COS-Theophylline-93.75           | 75.0 C                    | 4F-Phenoxycaffeine-250          | 75.0 W                    | Theophylline-93.75               | 75.0 $\epsilon$           |
| COS-Imidazole-62.5               | 75.0 C                    | 4F-Phenoxycaffeine-93.75        | 75.0 W                    | Theophylline-125                 | 75.0 $\epsilon$           |
| COS-Imidazole-93.75              | 75.0 C                    | 4F-Phenoxycaffeine-125          | 75.0 W                    | Br-Caffeine-62.5                 | 75.0 $\epsilon$           |
| COS-Imidazole-125                | 75.0 C                    | 4F-Phenoxycaffeine-187.5        | 75.0 W                    | Br-Caffeine-93.75                | 75.0 $\epsilon$           |
| COS-Imidazole-187.5              | 75.0 C                    | Br-Caffeine-62.5                | 75.0 W                    | Br-Caffeine-125                  | 75.0 $\epsilon$           |
| COS-I-Caffeine-125               | 75.0 C                    | 4F-Phenoxycaffeine-375          | 75.0 W                    | COS-Br-Caffeine-62.5             | 75.0 $\epsilon$           |
| COS-I-Caffeine-62.5              | 75.0 C                    | 4F-Phenoxycaffeine-500          | 75.0 W                    | COS-Caffeine-62.5                | 75.0 $\epsilon$           |
| COS-I-Caffeine-93.75             | 75.0 C                    | Control-0                       | 75.0 W                    | COS-Caffeine-93.75               | 75.0 $\epsilon$           |
| 4F-Phenoxycaffeine-187.5         | 75.0 C                    | COS-125                         | 75.0 W                    | Imidazole-125                    | 75.0 $\epsilon$           |
| COS-Br-Caffeine-62.5             | 75.0 C                    | Caffeine-62.5                   | 75.0 W                    | Theophylline-187.5               | 75.0 $\epsilon$           |
| COS-Br-Caffeine-125              | 75.0 C                    | COS-62.5                        | 75.0 W                    | Theophylline-250                 | 75.0 $\epsilon$           |
| COS-Br-Caffeine-187.5            | 75.0 C                    | COS-93.75                       | 75.0 W                    | COS-Caffeine-125                 | 75.0 $\epsilon$           |
| 4F-Phenoxycaffeine-93.75         | 75.0 C                    | COS-187.5                       | 75.0 W                    | COS-Caffeine-187.5               | 75.0 $\epsilon$           |
| 4F-Phenoxycaffeine-125           | 75.0 C                    | 4F-Phenoxycaffeine-750          | 71.1 V                    | COS-Caffeine-250                 | 75.0 $\epsilon$           |
| 4F-Phenoxycaffeine-375           | 75.0 C                    | COS-I-Caffeine-62.5             | 70.6 UV                   | Imidazole-93.75                  | 75.0 $\epsilon$           |
| COS-Br-Caffeine-250              | 75.0 C                    | COS-250                         | 70.6 UV                   | Theophylline-375                 | 75.0 $\epsilon$           |
| COS-4F-Phenoxycaffeine-375       | 75.0 C                    | COS-Theophylline-125            | 68.9 TUV                  | Theophylline-500                 | 75.0 $\epsilon$           |

|                              |        |                                  |            |                                  |            |
|------------------------------|--------|----------------------------------|------------|----------------------------------|------------|
| COS-Br-Caffeine-93.75        | 75.0 C | COS-Theophylline-Imidazole-93.75 | 68.9 TUV   | I-Caffeine-62.5                  | 75.0 ε     |
| F-Phenoxycaffeine-125        | 75.0 C | COS-4F-Phenoxycaffeine-125       | 68.9 TUV   | I-Caffeine-93.75                 | 75.0 ε     |
| COS-4F-Phenoxycaffeine-62.5  | 75.0 C | Imidazole-62.5                   | 68.9 TUV   | I-Caffeine-125                   | 75.0 ε     |
| COS-4F-Phenoxycaffeine-93.75 | 75.0 C | COS-Br-Caffeine-93.75            | 68.3 STUV  | Imidazole-62.5                   | 75.0 ε     |
| COS-4F-Phenoxycaffeine-125   | 75.0 C | 4F-Phenoxycaffeine-1000          | 68.3 STUV  | I-Caffeine-187.5                 | 75.0 ε     |
| COS-4F-Phenoxycaffeine-187.5 | 75.0 C | COS-F-Phenoxycaffeine-62.5       | 67.8 RSTUV | Caffeine-62.5                    | 75.0 ε     |
| COS-4F-Phenoxycaffeine-250   | 75.0 C | COS-Imidazole-62.5               | 67.2 QRSTU | Caffeine-93.75                   | 75.0 ε     |
| Caffeine-125                 | 75.0 C | COS-I-Caffeine-93.75             | 66.7 QRST  | Caffeine-125                     | 75.0 ε     |
| Caffeine-187.5               | 75.0 C | COS-Caffeine-187.5               | 66.7 QRST  | Caffeine-187.5                   | 75.0 ε     |
| Caffeine-250                 | 75.0 C | Caffeine-93.75                   | 66.7 QRST  | Caffeine-250                     | 75.0 ε     |
| F-Phenoxycaffeine-62.5       | 75.0 C | Imidazole-93.75                  | 66.1 QRST  | Control-0                        | 75.0 ε     |
| F-Phenoxycaffeine-93.75      | 75.0 C | Theophylline-250                 | 66.1 QRST  | COS-62.5                         | 75.0 ε     |
| Caffeine-62.5                | 75.0 C | COS-375                          | 66.1 QRST  | COS-125                          | 75.0 ε     |
| Caffeine-93.75               | 75.0 C | COS-Theophylline-187.5           | 65.6 PQRST | COS-93.75                        | 75.0 ε     |
| COS-250                      | 75.0 C | COS-4F-Phenoxycaffeine-187.5     | 65.6 PQRST | COS-187.5                        | 75.0 ε     |
| COS-375                      | 75.0 C | Br-Caffeine-93.75                | 65.0 PQRS  | COS-250                          | 75.0 ε     |
| COS-500                      | 75.0 C | COS-I-Caffeine-Imidazole-62.5    | 64.4 OPQR  | Br-Caffeine-187.5                | 71.1 δ     |
| COS-93.75                    | 75.0 C | 4F-Phenoxycaffeine-1500          | 64.4 OPQR  | COS-375                          | 71.1 δ     |
| COS-125                      | 75.0 C | I-Caffeine-93.75                 | 64.4 OPQR  | I-Caffeine-250                   | 70.6 χδ    |
| COS-187.5                    | 75.0 C | COS-Theophylline-Imidazole-125   | 63.9 NOPQ  | COS-Theophylline-250             | 69.4 βχδ   |
| COS-F-Phenoxycaffeine-93.75  | 75.0 C | F-Phenoxycaffeine-62.5           | 63.9 NOPQ  | COS-Imidazole-62.5               | 69.4 βχδ   |
| COS-62.5                     | 75.0 C | COS-4F-Phenoxycaffeine-250       | 62.2 MNOP  | COS-4F-Phenoxycaffeine-125       | 69.4 βχδ   |
| COS-F-Phenoxycaffeine-62.5   | 75.0 C | Imidazole-125                    | 62.2 MNOP  | COS-Theophylline-Imidazole-187.5 | 68.9 αβχδ  |
| COS-Caffeine-93.75           | 75.0 C | F-Phenoxycaffeine-93.75          | 62.2 MNOP  | COS-I-Caffeine-250               | 68.9 αβχδ  |
| COS-Caffeine-125             | 75.0 C | Caffeine-125                     | 62.2 MNOP  | Imidazole-187.5                  | 68.9 αβχδ  |
| COS-Caffeine-187.5           | 75.0 C | COS-Br-Caffeine-125              | 61.1 LMNO  | I-Caffeine-375                   | 67.8 Ζαβχδ |
| COS-Caffeine-250             | 75.0 C | Br-Caffeine-125                  | 61.1 LMNO  | COS-Imidazole-93.75              | 67.2 ΥΖαβχ |
| COS-Caffeine-375             | 75.0 C | Theophylline-375                 | 60.6 KLMN  | COS-Br-Caffeine-125              | 67.2 ΥΖαβχ |
| Theophylline-62.5            | 75.0 C | F-Phenoxycaffeine-125            | 59.4 JKLM  | Br-Caffeine-250                  | 66.7 ΥΖαβ  |
| Theophylline-250             | 75.0 C | COS-Theophylline-Imidazole-187.5 | 58.9 IJKLM | Caffeine-375                     | 66.1 ΥΖαβ  |
| Theophylline-375             | 75.0 C | COS-Caffeine-250                 | 58.9 IJKLM | COS-Theophylline-Imidazole-250   | 65.6 XYZα  |
| Theophylline-500             | 75.0 C | Imidazole-187.5                  | 58.9 IJKLM | COS-Theophylline-375             | 65.6 XYZα  |
| Theophylline-750             | 75.0 C | COS-Theophylline-250             | 57.8 HIJKL | COS-I-Caffeine-375               | 65.6 XYZα  |
| COS-Caffeine-62.5            | 75.0 C | I-Caffeine-125                   | 57.8 HIJKL | 4F-Phenoxycaffeine-62.5          | 65.0 WXYZ  |
| Control-0                    | 75.0 C | F-Phenoxycaffeine-187.5          | 57.8 HIJKL | COS-4F-Phenoxycaffeine-187.5     | 65.0 WXYZ  |
| Theophylline-93.75           | 75.0 C | COS-I-Caffeine-125               | 57.2 GHIJK | Imidazole-250                    | 65.0 WXYZ  |
| Theophylline-125             | 75.0 C | COS-4F-Phenoxycaffeine-375       | 57.2 GHIJK | F-Phenoxycaffeine-62.5           | 65.0 WXYZ  |
| Theophylline-187.5           | 75.0 C | COS-Imidazole-93.75              | 56.7 GHIJ  | COS-Imidazole-125                | 64.4 VWXYZ |
| Imidazole-250                | 75.0 C | F-Phenoxycaffeine-250            | 55.6 FGHI  | Theophylline-750                 | 64.4 VWXYZ |
| Imidazole-375                | 75.0 C | Imidazole-250                    | 55.0 EFGH  | Br-Caffeine-375                  | 63.9 UVWXY |



|                                |          |                                |            |                                |              |
|--------------------------------|----------|--------------------------------|------------|--------------------------------|--------------|
| 4F-Phenoxycaffeine-250         | 75.0 C   | Br-Caffeine-187.5              | 55.0 EFGH  | COS-I-Caffeine-Imidazole-62.5  | 62.2 TUVWX   |
| Br-Caffeine-62.5               | 75.0 C   | COS-F-Phenoxycaffeine-93.75    | 54.4 DEFGH | COS-Imidazole-187.5            | 61.7 STUVW   |
| Br-Caffeine-93.75              | 75.0 C   | F-Phenoxycaffeine-375          | 53.9 CDEFG | COS-Br-Caffeine-187.5          | 61.1 ARSTUV  |
| Br-Caffeine-125                | 75.0 C   | F-Phenoxycaffeine-500          | 52.2 BCDEF | COS-4F-Phenoxycaffeine-250     | 61.1 ARSTUV  |
| Br-Caffeine-187.5              | 75.0 C   | COS-4F-Phenoxycaffeine-500     | 51.7 ABCDE | Imidazole-375                  | 60.6 QARSTU  |
| Br-Caffeine-250                | 75.0 C   | COS-I-Caffeine-187.5           | 51.7 ABCDE | I-Caffeine-500                 | 60.0 PQARST  |
| I-Caffeine-62.5                | 75.0 C   | COS-F-Phenoxycaffeine-125      | 51.1 zABCD | Br-Caffeine-500                | 59.4 OPQARST |
| I-Caffeine-93.75               | 75.0 C   | COS-I-Caffeine-Imidazole-93.75 | 50.6 yzABC | COS-Imidazole-250              | 58.9 OPQARST |
| Imidazole-62.5                 | 75.0 C   | COS-Theophylline-Imidazole-250 | 50.6 yzABC | COS-Br-Caffeine-250            | 58.9 OPQARST |
| Imidazole-93.75                | 75.0 C   | COS-500                        | 50.0 yzAB  | COS-Theophylline-500           | 58.3 OPQARS  |
| Imidazole-125                  | 75.0 C   | Imidazole-375                  | 48.9 xyzAB | Imidazole-500                  | 57.8 NOPQAR  |
| Imidazole-187.5                | 75.0 C   | COS-Theophylline-375           | 48.9 xyzAB | COS-Theophylline-Imidazole-375 | 57.2 MNOPQ   |
| 4F-Phenoxycaffeine-500         | 75.0 C   | F-Phenoxycaffeine-750          | 48.9 xyzAB | COS-I-Caffeine-Imidazole-93.75 | 57.2 MNOPQ   |
| 4F-Phenoxycaffeine-750         | 75.0 C   | Theophylline-500               | 48.3 xyzA  | 4F-Phenoxycaffeine-93.75       | 57.2 MNOPQ   |
| I-Caffeine-125                 | 71.1 B   | COS-Br-Caffeine-187.5          | 47.8 xyz   | Imidazole-750                  | 56.7 LMNOP   |
| 4F-Phenoxycaffeine-1000        | 70.6 B   | COS-F-Phenoxycaffeine-187.5    | 47.2 xy    | Theophylline-1000              | 56.7 LMNOP   |
| F-Phenoxycaffeine-187.5        | 69.4 AB  | Caffeine-187.5                 | 47.2 xy    | COS-500                        | 56.1 LMNO    |
| Imidazole-500                  | 69.4 AB  | Imidazole-500                  | 46.1 wx    | COS-Caffeine-375               | 54.4 KLMN    |
| COS-Imidazole-250              | 68.9 AB  | F-Phenoxycaffeine-1000         | 46.1 wx    | Imidazole-1000                 | 53.9 JKLM    |
| COS-F-Phenoxycaffeine-125      | 68.9 AB  | COS-Imidazole-125              | 46.1 wx    | COS-Br-Caffeine-375            | 53.3 IJKL    |
| Theophylline-1000              | 68.9 AB  | COS-F-Phenoxycaffeine-250      | 43.3 vw    | COS-I-Caffeine-500             | 53.3 IJKL    |
| Br-Caffeine-375                | 67.2 zA  | F-Phenoxycaffeine-1500         | 42.2 uv    | Theophylline-1500              | 52.2 IJK     |
| F-Phenoxycaffeine-250          | 67.2 zA  | Caffeine-250                   | 41.7 uv    | 4F-Phenoxycaffeine-125         | 51.7 HIJK    |
| COS-Br-Caffeine-375            | 67.2 zA  | COS-F-Phenoxycaffeine-375      | 41.1 uv    | I-Caffeine-750                 | 50.6 GHIJ    |
| COS-4F-Phenoxycaffeine-500     | 67.2 zA  | Theophylline-750               | 40.6 uv    | COS-4F-Phenoxycaffeine-375     | 50.0 FGHI    |
| COS-I-Caffeine-187.5           | 66.1 yz  | I-Caffeine-187.5               | 40.0 uv    | COS-Caffeine-500               | 48.3 EFGH    |
| COS-Theophylline-Imidazole-500 | 66.1 yz  | COS-Imidazole-187.5            | 39.4 tu    | COS-Theophylline-Imidazole-500 | 47.2 DEFG    |
| 4F-Phenoxycaffeine-1500        | 65.6 xyz | COS-F-Phenoxycaffeine-500      | 36.1 st    | 4F-Phenoxycaffeine-187.5       | 46.7 CDEF    |
| F-Phenoxycaffeine-375          | 64.4 xy  | Br-Caffeine-250                | 35.6 s     | COS-F-Phenoxycaffeine-62.5     | 45.6 BCDE    |
| Imidazole-750                  | 63.9 wxy | COS-Imidazole-250              | 35.6 s     | 4F-Phenoxycaffeine-250         | 44.4 BCD     |
| Theophylline-1500              | 63.3 vwx | COS-Br-Caffeine-250            | 34.4 rs    | COS-Br-Caffeine-500            | 43.9 ABCD    |
| Caffeine-375                   | 61.7 uvw | Imidazole-750                  | 33.3 rs    | Br-Caffeine-750                | 43.3 zABC    |
| F-Phenoxycaffeine-500          | 61.1 tuv | Caffeine-375                   | 32.8 rs    | COS-I-Caffeine-Imidazole-125   | 42.8 zAB     |
| I-Caffeine-187.5               | 59.4 stu | COS-Caffeine-375               | 32.8 rs    | COS-Theophylline-Imidazole-750 | 42.2 yzAB    |
| COS-I-Caffeine-Imidazole-125   | 58.9 rst | Br-Caffeine-375                | 31.7 qr    | COS-4F-Phenoxycaffeine-500     | 40.6 yzA     |
| F-Phenoxycaffeine-750          | 58.9 rst | COS-I-Caffeine-Imidazole-125   | 31.7 qr    | COS-I-Caffeine-Imidazole-187.5 | 40.0 xyz     |
| COS-F-Phenoxycaffeine-187.5    | 57.2 qrs | Theophylline-1000              | 28.9 pq    | COS-F-Phenoxycaffeine-93.75    | 40.0 xyz     |
| COS-I-Caffeine-250             | 56.7 pqr | COS-Imidazole-375              | 28.3 pq    | 4F-Phenoxycaffeine-375         | 38.9 xy      |
| I-Caffeine-250                 | 55.6 pq  | I-Caffeine-250                 | 27.8 op    | F-Phenoxycaffeine-93.75        | 38.9 xy      |
| F-Phenoxycaffeine-1000         | 54.4 op  | Caffeine-500                   | 27.2 op    | I-Caffeine-1000                | 36.7 wx      |

|                                |          |                                |           |                                 |            |
|--------------------------------|----------|--------------------------------|-----------|---------------------------------|------------|
| COS-Imidazole-375              | 54.4 op  | COS-I-Caffeine-250             | 27.2 op   | Caffeine-500                    | 33.9 vw    |
| Imidazole-1000                 | 54.4 op  | COS-Theophylline-500           | 27.2 op   | COS-F-Phenoxycaffeine-125       | 33.9 vw    |
| Caffeine-500                   | 52.2 no  | COS-Theophylline-Imidazole-375 | 26.7 nop  | COS-Imidazole-375               | 33.9 vw    |
| I-Caffeine-375                 | 51.7 mn  | COS-F-Phenoxycaffeine-750      | 25.6 mnop | F-Phenoxycaffeine-125           | 32.2 uv    |
| F-Phenoxycaffeine-1500         | 50.6 mn  | COS-Caffeine-500               | 24.4 mno  | COS-F-Phenoxycaffeine-187.5     | 31.1 tuv   |
| Br-Caffeine-500                | 50.6 mn  | Theophylline-1500              | 24.4 mno  | COS-Br-Caffeine-750             | 31.1 tuv   |
| COS-Br-Caffeine-500            | 50.0 mn  | I-Caffeine-375                 | 23.3 mn   | COS-Imidazole-500               | 30.6 tuv   |
| COS-F-Phenoxycaffeine-250      | 49.4 m   | Br-Caffeine-500                | 22.8 lm   | Caffeine-750                    | 30.0 tu    |
| COS-F-Phenoxycaffeine-375      | 46.1 l   | COS-I-Caffeine-375             | 22.2 klm  | 4F-Phenoxycaffeine-500          | 30.0 tu    |
| COS-I-Caffeine-Imidazole-187.5 | 45.0 l   | COS-I-Caffeine-Imidazole-187.5 | 19.4 jkl  | COS-750                         | 29.4 stu   |
| COS-F-Phenoxycaffeine-500      | 36.7 k   | Caffeine-750                   | 18.9 ijk  | COS-F-Phenoxycaffeine-250       | 29.4 stu   |
| COS-Imidazole-500              | 35.0 jk  | COS-Br-Caffeine-375            | 18.9 ijk  | F-Phenoxycaffeine-187.5         | 28.3 rst   |
| I-Caffeine-500                 | 33.9 ij  | COS-Imidazole-500              | 17.2 hij  | Imidazole-1500                  | 26.1 qrs   |
| Imidazole-1500                 | 33.9 ij  | COS-750                        | 16.7 hij  | COS-F-Phenoxycaffeine-375       | 25.6 pqr   |
| Caffeine-750                   | 32.8 ij  | COS-4F-Phenoxycaffeine-750     | 15.6 ghi  | F-Phenoxycaffeine-250           | 25.0 opqr  |
| COS-I-Caffeine-Imidazole-250   | 32.2 i   | COS-Theophylline-Imidazole-500 | 15.6 ghi  | COS-I-Caffeine-750              | 25.0 opqr  |
| COS-Caffeine-500               | 32.2 i   | Caffeine-1000                  | 13.9 fgh  | COS-Imidazole-750               | 24.4 nopq  |
| COS-4F-Phenoxycaffeine-750     | 25.6 h   | Br-Caffeine-750                | 12.8 efg  | 4F-Phenoxycaffeine-750          | 23.9 nopq  |
| Caffeine-1000                  | 23.9 h   | I-Caffeine-500                 | 12.8 efg  | F-Phenoxycaffeine-375           | 23.9 nopq  |
| COS-I-Caffeine-375             | 21.1 g   | COS-F-Phenoxycaffeine-1000     | 12.8 efg  | F-Phenoxycaffeine-500           | 22.2 mnop  |
| COS-750                        | 20.6 fg  | I-Caffeine-750                 | 10.6 def  | COS-Caffeine-750                | 22.2 mnop  |
| COS-Imidazole-750              | 20.6 fg  | COS-I-Caffeine-500             | 10.0 cde  | COS-4F-Phenoxycaffeine-750      | 21.7 mno   |
| COS-Theophylline-Imidazole-750 | 20.0 efg | Imidazole-1000                 | 7.8 bcd   | COS-1000                        | 21.1 mn    |
| COS-F-Phenoxycaffeine-750      | 18.9 efg | COS-Caffeine-750               | 7.8 bcd   | F-Phenoxycaffeine-750           | 20.0 lm    |
| I-Caffeine-750                 | 18.3 ef  | COS-Theophylline-750           | 7.8 bcd   | COS-F-Phenoxycaffeine-500       | 20.0 lm    |
| COS-Theophylline-750           | 17.8 e   | COS-I-Caffeine-Imidazole-250   | 7.8 bcd   | COS-I-Caffeine-Imidazole-250    | 19.4 lm    |
| COS-1000                       | 15.0 d   | I-Caffeine-1000                | 7.2 bcd   | 4F-Phenoxycaffeine-1000         | 17.2 kl    |
| COS-Theophylline-1000          | 12.2 c   | COS-4F-Phenoxycaffeine-1000    | 7.2 bcd   | F-Phenoxycaffeine-1000          | 17.2 kl    |
| COS-I-Caffeine-Imidazole-375   | 12.2 c   | COS-Br-Caffeine-500            | 6.7 bc    | Br-Caffeine-1000                | 16.7 kl    |
| I-Caffeine-1000                | 7.2 b    | I-Caffeine-1500                | 5.6 b     | F-Phenoxycaffeine-1500          | 15.6 jk    |
| COS-4F-Phenoxycaffeine-1000    | 7.2 b    | COS-1000                       | 4.7 b     | COS-I-Caffeine-Imidazole-375    | 15.6 jk    |
| Br-Caffeine-750                | 6.7 b    | Br-Caffeine-1000               | 0.0 a     | 4F-Phenoxycaffeine-1500         | 15.0 jk    |
| Caffeine-1500                  | 0.0 a    | COS-1500                       | 0.0 a     | Caffeine-1000                   | 14.4 ijk   |
| COS-1500                       | 0.0 a    | Br-Caffeine-1500               | 0.0 a     | I-Caffeine-1500                 | 13.9 hijk  |
| Br-Caffeine-1000               | 0.0 a    | Caffeine-1500                  | 0.0 a     | COS-Theophylline-Imidazole-1000 | 12.8 ghij  |
| Br-Caffeine-1500               | 0.0 a    | COS-Caffeine-1000              | 0.0 a     | COS-Caffeine-1000               | 12.2 fghij |
| I-Caffeine-1500                | 0.0 a    | COS-Caffeine-1500              | 0.0 a     | COS-Theophylline-750            | 11.1 efghi |
| COS-Caffeine-750               | 0.0 a    | Imidazole-1500                 | 0.0 a     | COS-F-Phenoxycaffeine-750       | 10.6 defgh |
| COS-Caffeine-1000              | 0.0 a    | COS-4F-Phenoxycaffeine-1500    | 0.0 a     | Caffeine-1500                   | 9.4 cdefg  |
| COS-Caffeine-1500              | 0.0 a    | COS-F-Phenoxycaffeine-1500     | 0.0 a     | COS-4F-Phenoxycaffeine-1000     | 8.9 bcdef  |

|                                 |          |                                 |          |                                 |          |
|---------------------------------|----------|---------------------------------|----------|---------------------------------|----------|
| COS-F-Phenoxycaffeine-1000      | 0.0 a    | COS-Br-Caffeine-750             | 0.0 a    | COS-Br-Caffeine-1000            | 8.3 bcde |
| COS-F-Phenoxycaffeine-1500      | 0.0 a    | COS-Br-Caffeine-1000            | 0.0 a    | COS-Caffeine-1500               | 7.2 bcd  |
| COS-4F-Phenoxycaffeine-1500     | 0.0 a    | COS-Br-Caffeine-1500            | 0.0 a    | COS-Imidazole-1000              | 7.2 bcd  |
| COS-Br-Caffeine-750             | 0.0 a    | COS-I-Caffeine-1500             | 0.0 a    | Br-Caffeine-1500                | 6.1 bc   |
| COS-Br-Caffeine-1000            | 0.0 a    | COS-I-Caffeine-750              | 0.0 a    | COS-Theophylline-1000           | 6.1 bc   |
| COS-Br-Caffeine-1500            | 0.0 a    | COS-I-Caffeine-1000             | 0.0 a    | COS-I-Caffeine-Imidazole-500    | 6.1 bc   |
| COS-I-Caffeine-500              | 0.0 a    | COS-Imidazole-750               | 0.0 a    | COS-F-Phenoxycaffeine-1000      | 5.6 b    |
| COS-I-Caffeine-750              | 0.0 a    | COS-Theophylline-1000           | 0.0 a    | COS-1500                        | 0.0 a    |
| COS-I-Caffeine-1000             | 0.0 a    | COS-Imidazole-1000              | 0.0 a    | COS-F-Phenoxycaffeine-1500      | 0.0 a    |
| COS-I-Caffeine-1500             | 0.0 a    | COS-Imidazole-1500              | 0.0 a    | COS-4F-Phenoxycaffeine-1500     | 0.0 a    |
| COS-Imidazole-1000              | 0.0 a    | COS-Theophylline-1500           | 0.0 a    | COS-Br-Caffeine-1500            | 0.0 a    |
| COS-Imidazole-1500              | 0.0 a    | COS-I-Caffeine-Imidazole-375    | 0.0 a    | COS-I-Caffeine-1500             | 0.0 a    |
| COS-I-Caffeine-Imidazole-500    | 0.0 a    | COS-I-Caffeine-Imidazole-500    | 0.0 a    | COS-I-Caffeine-1000             | 0.0 a    |
| COS-Theophylline-1500           | 0.0 a    | COS-I-Caffeine-Imidazole-1000   | 0.0 a    | COS-Imidazole-1500              | 0.0 a    |
| COS-I-Caffeine-Imidazole-1000   | 0.0 a    | COS-I-Caffeine-Imidazole-750    | 0.0 a    | COS-I-Caffeine-Imidazole-1500   | 0.0 a    |
| COS-I-Caffeine-Imidazole-750    | 0.0 a    | COS-I-Caffeine-Imidazole-1500   | 0.0 a    | COS-Theophylline-1500           | 0.0 a    |
| COS-I-Caffeine-Imidazole-1500   | 0.0 a    | COS-Theophylline-Imidazole-750  | 0.0 a    | COS-I-Caffeine-Imidazole-750    | 0.0 a    |
| COS-Theophylline-Imidazole-1500 | 0.0 a    | COS-Theophylline-Imidazole-1500 | 0.0 a    | COS-I-Caffeine-Imidazole-1000   | 0.0 a    |
| COS-Theophylline-Imidazole-1000 | 0.0 a    | COS-Theophylline-Imidazole-1000 | 0.0 a    | COS-Theophylline-Imidazole-1500 | 0.0 a    |
| Pr > F(Model)                   | < 0.0001 | Pr > F(Model)                   | < 0.0001 | Pr > F(Model)                   | < 0.0001 |
| Significant                     | Yes      | Significant                     | Yes      | Significant                     | Yes      |
